# Supplementary material
Source: Springer Nature journal article supplement (https://www.springermedizin.de/resource/supplementary/12959_2014_226_MOESM7_ESM.pdf/9569300)

### A) VTE recurrence in the subgroup age $\geq 75$ years

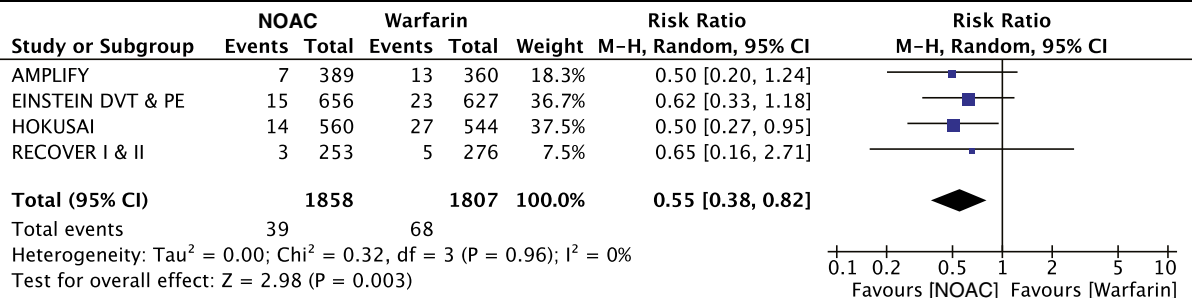

### B) VTE recurrence in the subgroup CrCl $\leq 50$ ml/min

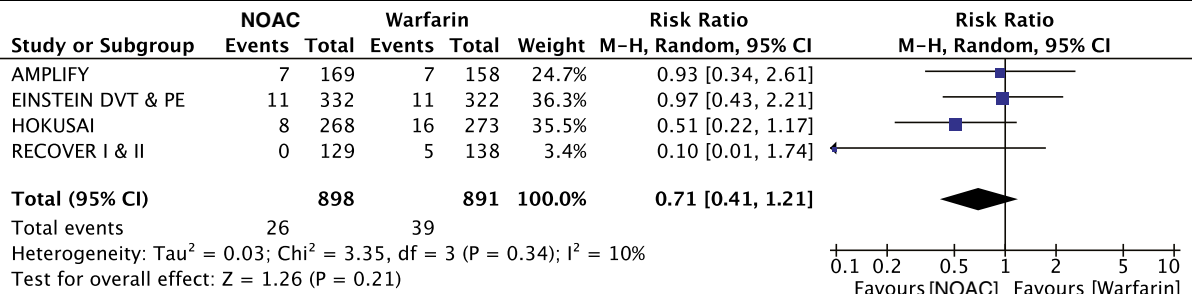

### C) Major bleeding in the subgroup age $\geq 75$ years

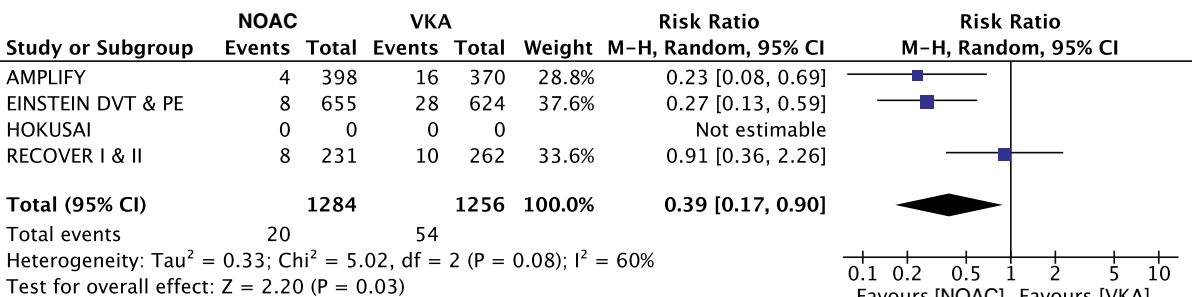

### D) Major bleeding in the subgroup CrCl $\leq 50$ ml/min

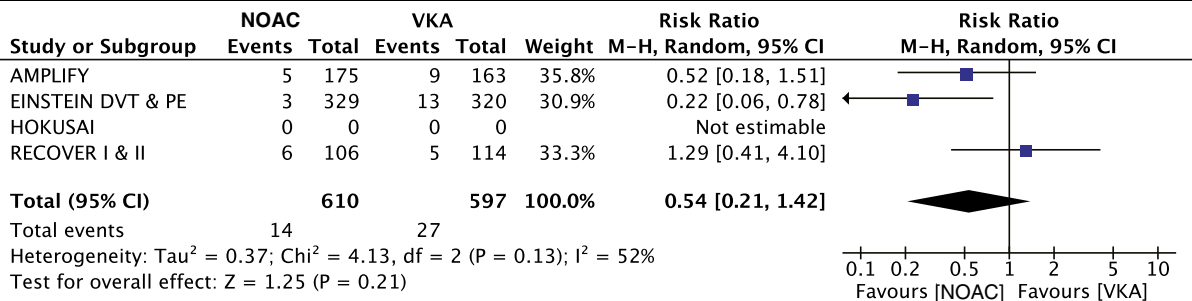

Supplement: MOESM7 [file 9569300]
